# Supplementary material for: Proteasomal Processing Immune Escape Mechanisms in Platinum-Treated Advanced Bladder Cancer
Source: MDPI journal article supplement (doi:10.3390/genes13030422), 2022-02-25
Supplement: s1 [file s1]

**Table S5:** metric correlations for each immune marker.

| <b>variable 1</b>           | <b>variable 2</b> | <b>test</b>                      | <b>normalization</b>                    | <b>p-value</b> |
|-----------------------------|-------------------|----------------------------------|-----------------------------------------|----------------|
| Number of affected epitopes | GZMB              | Spearman's Rank Correlation Test | None                                    | 0.9175         |
| Number of affected epitopes | LCA               | Spearman's Rank Correlation Test | None                                    | 0.9318         |
| Number of affected epitopes | CD8               | Spearman's Rank Correlation Test | None                                    | 0.4612         |
| Number of affected epitopes | GZMB normalized   | Spearman's Rank Correlation Test | To the total number of leucocytes (LCA) | 0.6128         |
| Number of affected epitopes | CD8 normalized    | Spearman's Rank Correlation Test | To the total number of leucocytes (LCA) | 0.7608         |
| Number of affected epitopes | PD-L1 TPS         | Spearman's Rank Correlation Test | None                                    | 0.5471         |
| Number of affected epitopes | PD-L1 CPS         | Spearman's Rank Correlation Test | None                                    | 0.5989         |
| Number of affected epitopes | PD-L1 IC-Score    | Spearman's Rank Correlation Test | None                                    | 0.9096         |

Supplementary Table S5: metric correlations for each immune marker.

GRZMB: granzyme B, LCA: leucocyte common antigen (CD45), PD-L1: Programmed death-ligand 1, TPS: Tumor proportion score, CPS: combined positive score, IC-Score: Immune cell score.
