# Supplementary material for: Proteasomal Processing Immune Escape Mechanisms in Platinum-Treated Advanced Bladder Cancer
Source: MDPI journal article supplement (doi:10.3390/genes13030422), 2022-02-25
Supplement: s1 [file s1]

Figure S1

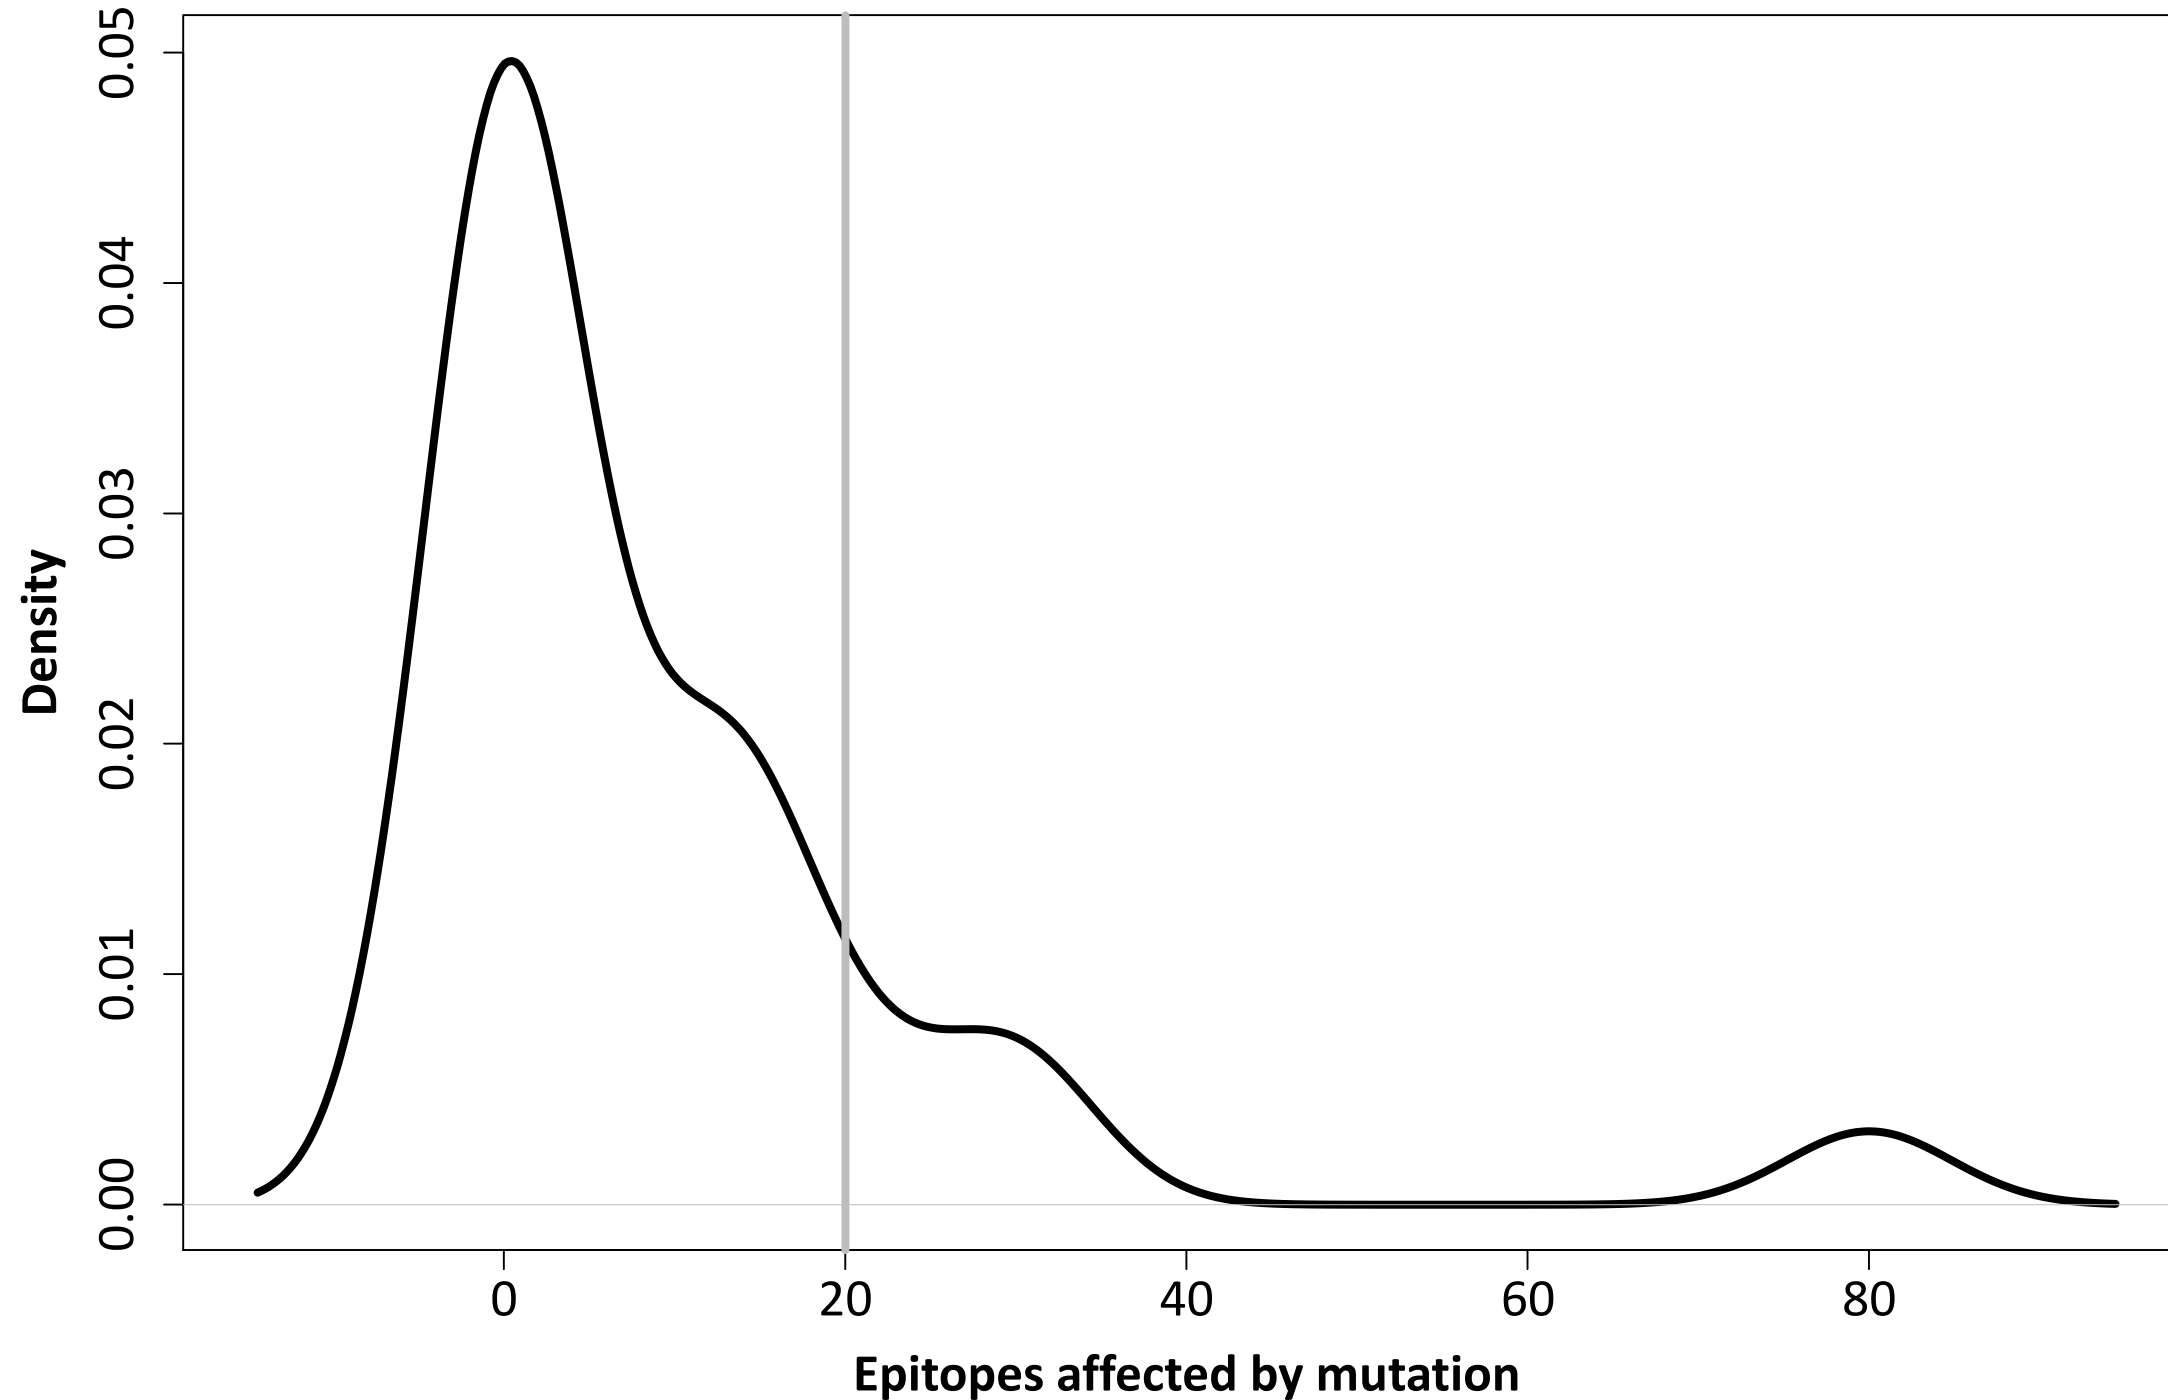

**Figure S1: Density distribution of the affected epitopes.**

This plot visualizes the density or amount of data points (y-axis) around discrete epitope frequencies (x-axis).

The shape of the density curve highlights a three distinct clusters (Around 0, 20 and 80 epitopes). The second cluster, that is distinct from the 0 forms around an epitope frequency of 20. Therefore, we chose 20 as our threshold to distinguish low ( $n = 22$ ) and high amount of epitopes ( $n=4$ ).
