# Supplementary material for: Proteasomal Processing Immune Escape Mechanisms in Platinum-Treated Advanced Bladder Cancer
Source: MDPI journal article supplement (doi:10.3390/genes13030422), 2022-02-25
Supplement: s1 [file s1]

**Table S3.** Detailed antibody protocol information for immunohistochemistry

| <b>Antibody</b> | <b>Vendor; Clone / #</b> | <b>Pretreatment</b> | <b>Dilution</b> | <b>Incubation</b> | <b>Detection system</b>        |
|-----------------|--------------------------|---------------------|-----------------|-------------------|--------------------------------|
| PD-L1           | Abcam; 28-8              | CC1, 90°C, 40min    | 1:250           | 36°C, 32min       | OptiView DAB IHC Detection Kit |
| LCA (CD45)      | Dako; 2B11 / PD7/26      | CC1, 90°C, 32min    | 1:1000          | 36°C, 24min       | OptiView DAB IHC Detection Kit |
| CD8             | Dako; C8/144B            | CC1, 95°C, 40min    | 1:150           | 36°C, 24min       | OptiView DAB IHC Detection Kit |
| Granzyme B      | Novocastra; 11F1         | CC1, 90°C, 32min    | 1:80            | 36°C, 32min       | OptiView DAB IHC Detection Kit |
