# Supplementary material for: Proteasomal Processing Immune Escape Mechanisms in Platinum-Treated Advanced Bladder Cancer
Source: MDPI journal article supplement (doi:10.3390/genes13030422), 2022-02-25
Supplement: s1 [file s1]

**Table S1.** Detailed clinico-pathological, molecular and immunohistochemical data of the cohort

| Id    | Sex    | Age at diagnosis (y) | Clinico-pathological data |               |                |       |                     | UC subtype             | Treatment     | OS (days) | Status | PFS (days) | Gene   | Molecular data       |        |                |        | IHC data (PD-L1) |               |           |                    |    |
|-------|--------|----------------------|---------------------------|---------------|----------------|-------|---------------------|------------------------|---------------|-----------|--------|------------|--------|----------------------|--------|----------------|--------|------------------|---------------|-----------|--------------------|----|
|       |        |                      | Tumor stage (pT)          | LN stage (pN) | Metastasis (M) | Grade | UC subtype (yes/no) |                        |               |           |        |            |        | Alteration           | Gene   | Alteration     | Gene   | Alteration       | PD-L1 TPS (%) | PD-L1 CPS | PD-L1 IC-Score (%) |    |
| UC_01 | male   | 49                   | 4                         | 1             | 1              | 3     | no                  | 100% NOS               | MVEC          | 3107      | dead   | 3107       | HRAS   | c.34G>A              | TP53   | c.715G>A       |        |                  |               | 5         | 6                  | 1  |
| UC_02 | male   | 66                   | 4                         | 0             | 1              | 3     | n/a                 | n/a                    | Cis/MTX       | 138       | dead   | 55         | TP53   | c.339C>G             |        |                |        |                  |               |           |                    |    |
| UC_03 | male   | 51                   | 3                         | 1             | 0              | 3     | no                  | 100% NOS               | Gem/Cis       | 478       | alive  | 478        | TP53   | c.991C>T             |        |                |        |                  |               | 15        | 80                 | 50 |
| UC_04 | male   | 51                   | 4                         | 1             | 1              | 3     | no                  | 100% NOS               | Cis/Carbo/MTX | 285       | dead   | 231        | TP53   | c.978delA            |        |                |        |                  |               | 20        | 25                 | 4  |
| UC_05 | female | 54                   | 3                         | 1             | 0              | 3     | yes                 | 100% plasmacytoid      | Gem/Cis       | 162       | dead   | 162        | TP53   | c.659A>G             |        |                |        |                  |               | 70        | 72                 | 1  |
| UC_06 | male   | 64                   | 2                         | 0             | 1              | 2     | n/a                 | n/a                    | Cis/MTX       | 204       | dead   | 125        | TP53   | c.839G>A             | TP53   | c.538G>A       |        |                  |               |           |                    |    |
| UC_07 | male   | 69                   | 3                         | 1             | 0              | 3     | yes                 | 95% NOS, 5% MPUC       | Gem/Cis       | 1041      | alive  | 317        | TP53   | c.617T>A             |        |                |        |                  |               | 0         | 3                  | 2  |
| UC_08 | male   | 48                   | 3                         | 0             | 0              | 3     | n/a                 | n/a                    | Gem/Cis       | 28        | dead   | 28         | TP53   | c.637C>T             |        |                |        |                  |               |           |                    |    |
| UC_09 | female | 51                   | 2                         | 1             | 0              | 2     | no                  | 100% NOS               | Gem/Cis       | 736       | dead   | 622        | FGFR3  | c.1118A>G            | PIK3CA | c.1048G>A      | PIK3CA | c.3140A>G        |               | 80        | 90                 | 15 |
| UC_10 | female | 83                   | 3                         | 1             | 0              | 3     | yes                 | 80% NOS, 20% MPUC      | Gem/Cis       | 181       | dead   | 181        | KRAS   | c.34G>T              |        |                |        |                  |               | 8         | 8                  | 0  |
| UC_11 | male   | 63                   | 3                         | 0             | 1              | 3     | yes                 | 80% NOS, 20% glandular | Gem/Cis       | 1406      | alive  | 211        | TP53   | c.743G>A             |        |                |        |                  |               | 75        | 85                 | 7  |
| UC_12 | female | 68                   | 2                         | 1             | 0              | 2     | yes                 | 100% MPUC              | Gem/Cis       | 716       | alive  | 716        | wt     |                      |        |                |        |                  |               | 30        | 30                 | 0  |
| UC_13 | female | 39                   | 3                         | 1             | 0              | 2     | yes                 | 80% squamous, 20% NOS  | Gem/Cis       | 135       | dead   | 23         | PIK3CA | c.1633G>A            | TP53   | c.890_900del11 |        |                  |               | 3         | 8                  | 6  |
| UC_14 | male   | 77                   | 3                         | 1             | 1              | 3     | n/a                 | n/a                    | Gem/Cis       | 1522      | dead   | 1522       | TP53   | c.839G>C             |        |                |        |                  |               |           |                    |    |
| UC_15 | male   | 74                   | 3                         | 0             | 1              | 3     | yes                 | 100% sarcomatoid       | Gem/Cis       | 99        | dead   | 99         | TP53   | c.374_375delCCGinsTT | TP53   | c.743G>A       | HRAS   | c.34G>A          |               | 60        | 60                 | 0  |
| UC_16 | male   | 68                   | 2                         | 1             | 0              | 2     | no                  | 100% NOS               | Gem/Cis       | 213       | dead   | 191        | wt     |                      |        |                |        |                  |               | 0         | 0                  | 0  |
| UC_17 | male   | 70                   | 3                         | 0             | 1              | 3     | no                  | 100% NOS               | Gem/Cis       | 920       | dead   | 556        | FGFR3  | c.742C>T             | TP53   | c.853G>T       |        |                  |               | 0         | 1                  | 1  |
| UC_18 | male   | 55                   | 3                         | 1             | 1              | 3     | no                  | 100% NOS               | Gem/Cis       | 223       | dead   | 136        | TP53   | c.743G>A             |        |                |        |                  |               | 60        | 65                 | 3  |
| UC_19 | male   | 60                   | 4                         | 0             | 0              | 3     | yes                 | 100% plasmacytoid      | Gem/Cis       | 1372      | dead   | 1277       | wt     |                      |        |                |        |                  |               | 3         | 3                  | 6  |
| UC_20 | male   | 69                   | 4                         | 0             | 0              | 3     | no                  | 100% NOS               | MVEC          | 153       | dead   | 19         | STK11  | c.971C>T             | ERBB2  | c.3235G>A      |        |                  |               | 0         | 2                  | 2  |
| UC_21 | male   | 41                   | 3                         | 0             | 0              | 3     | n/a                 | n/a                    | Gem/Cis       | 797       | dead   | 797        | wt     |                      |        |                |        |                  |               |           |                    |    |
| UC_22 | male   | 65                   | 3                         | 0             | 0              | 3     | no                  | 100% NOS               | MVEC          | 3604      | alive  | 3604       | PIK3CA | c.1624G>A            | TP53   | c.223C>T       | STK11  | c.408G>A         |               | 2         | 4                  | 1  |
| UC_23 | male   | 61                   | 3                         | 1             | 0              | 3     | no                  | 100% NOS               | MVEC          | 3757      | alive  | 3757       | KRAS   | c.35G>A              |        |                |        |                  |               | 2         | 3                  | 2  |
| UC_24 | male   | 59                   | 4                         | 1             | 1              | 3     | no                  | 100% NOS               | Cis/MTX       | 458       | dead   | 336        | TP53   | c.488A>G             |        |                |        |                  |               | 0         | 1                  | 1  |
| UC_25 | male   | 70                   | 3                         | 1             | 0              | 3     | n/a                 | n/a                    | Gem/Cis       | 1065      | dead   | 1065       | TP53   | c.833C>G             | STK11  | c.971C>T       |        |                  |               |           |                    |    |
| UC_26 | male   | 75                   | 3                         | 0             | 1              | 3     | yes                 | 80% NOS, 20% MPUC      | Gem/Cis       | 182       | dead   | 72         | TP53   | c.839G>A             | TP53   | c.538G>A       |        |                  |               | 20        | 25                 | 3  |

All cases were classified according to the 7<sup>th</sup> edition of the TNM Classification of Malignant Tumors

IHC: immunohistochemistry, Id: identification number, Y: years, LN: lymph node, UC: urothelial carcinoma, OS: overall survival, PFS: progression free survival, PD-L1 TPS: PD-L1 tumor proportion score, PD-L1 CPS: PD-L1 combined positive score, PD-L1 IC-Score: PD-L1 immune cell score, n/a: data not available, NOS: not otherwise specified, MPUC: micropapillary urothelial carcinoma, MVEC: Methotrexate/Vinblastine/Epirubicin/Cisplatin, Cis/MTX: Cisplatin/Methotrexate, Gem/Cis: Gemcitabin/Cisplatin, Cis/Carbo/MTX: Cisplatin/Carboplatin/Methotrexate, mo: months, wt: wild-type.
