# Supplementary material for: Proteasomal Processing Immune Escape Mechanisms in Platinum-Treated Advanced Bladder Cancer
Source: MDPI journal article supplement (doi:10.3390/genes13030422), 2022-02-25
Supplement: s1 [file s1]

**Table S2.** Covered exonic regions in targeted next generation sequencing analyses

| <b>Gene</b>                     | <b>covered exons</b> |
|---------------------------------|----------------------|
| <i>BRAF</i>                     | 11,15                |
| <i>EGFR</i>                     | 18-21                |
| <i>ERBB2</i>                    | 5,6,15,20,23,29      |
| <i>FGFR1</i>                    | 3,7,13,17            |
| <i>FGFR3</i>                    | 7,9                  |
| <i>HRAS</i>                     | 2-4                  |
| <i>IDH1</i>                     | 4                    |
| <i>IDH2</i>                     | 4                    |
| <i>KIT</i>                      | 9,10,11,13,17,18     |
| <i>KRAS</i>                     | 2-4                  |
| <i>MET</i>                      | 3,8,11,14,19         |
| <i>NRAS</i>                     | 2-4                  |
| <i>PDGFR<math>\alpha</math></i> | 12,14,18             |
| <i>PIK3CA</i>                   | 3,5,10,16,21         |
| <i>RET</i>                      | 7,10,11,13-16        |
| <i>STK11</i>                    | 1-9                  |
| <i>TP53</i>                     | 2-11                 |
