# Supplementary material for: Proteasomal Processing Immune Escape Mechanisms in Platinum-Treated Advanced Bladder Cancer
Source: MDPI journal article supplement (doi:10.3390/genes13030422), 2022-02-25
Supplement: s1 [file s1]

**Table S6:** dichotomous correlations for each immune marker.

| <b>variable 1</b>           | <b>variable 2</b> | <b>test</b>            | <b>normalization</b>                    | <b>p-value</b> |
|-----------------------------|-------------------|------------------------|-----------------------------------------|----------------|
| Number of affected epitopes | GZMB              | Wilcoxon Rank-Sum Test | None                                    | 0.2590         |
| Number of affected epitopes | LCA               | Wilcoxon Rank-Sum Test | None                                    | 0.5835         |
| Number of affected epitopes | CD8               | Wilcoxon Rank-Sum Test | None                                    | 0.1065         |
| Number of affected epitopes | GZMB normalized   | Wilcoxon Rank-Sum Test | To the total number of leucocytes (LCA) | 0.7471         |
| Number of affected epitopes | CD8 normalized    | Wilcoxon Rank-Sum Test | To the total number of leucocytes (LCA) | 0.6341         |
| Number of affected epitopes | PD-L1 TPS         | Wilcoxon Rank-Sum Test | None                                    | 0.4679         |
| Number of affected epitopes | PD-L1 CPS         | Wilcoxon Rank-Sum Test | None                                    | 0.6369         |
| Number of affected epitopes | PD-L1 IC-Score    | Wilcoxon Rank-Sum Test | None                                    | 0.7639         |

Supplementary Table S6: dichotomous correlations for each immune marker.

GRZMB: granzyme B, LCA: leucocyte common antigen (CD45), PD-L1: Programmed death-ligand 1, TPS: Tumor proportion score, CPS: combined positive score, IC-Score: Immune cell score.
