# Supplementary material for: Proteasomal Processing Immune Escape Mechanisms in Platinum-Treated Advanced Bladder Cancer
Source: MDPI journal article supplement (doi:10.3390/genes13030422), 2022-02-25
Supplement: s1 [file s1]

**Table S4:** Supplementary contingency table of all immunohistochemical markers

|                                                                                                          | Q1 | Q2 | Q3 | Q4 |
|----------------------------------------------------------------------------------------------------------|----|----|----|----|
| <b>GZMB: Positive cell detection per mm<sup>2</sup> (Q0/1/2/3/4: 1.279/4.31225/8.836/17.4475/241.57)</b> | 6  | 6  | 6  | 6  |
| <b>LCA: Positive cell detection per mm<sup>2</sup> (Q0/1/2/3/4: 29.18/175.81/323.115/700.675/1948.8)</b> | 6  | 6  | 6  | 6  |
| <b>CD8: Positive cell detection per mm<sup>2</sup> (Q0/1/2/3/4: 0.6792/52.01/124.84/385.03/3141)</b>     | 7  | 6  | 6  | 6  |
| <b>PD-L1 / TPS: H-Score (Q0/1/2/3/4: 0/1.5/6.5/37.5/80)</b>                                              | 5  | 5  | 5  | 5  |
| <b>PD-L1 / CPS: H-Score (Q0/1/2/3/4: 0/3/8/61.25/90)</b>                                                 | 7  | 4  | 4  | 5  |
| <b>PD-L1 / IC-Score: H-Score (Q0/1/2/3/4: 0/1/2/4.5/50)</b>                                              | 9  | 3  | 3  | 5  |

**Supplementary Table S4:** contingency table of all immunohistochemical markers

GRZMB: granzyme B, LCA: leucocyte common antigen (CD45), PD-L1: Programmed death-ligand 1, TPS: Tumor proportion score, CPS: combined positive score, IC-Score: Immune cell score.
